# Supplementary material for: Conserved synteny at the protein family level reveals genes underlying Shewanella species’ cold tolerance and predicts their novel phenotypes
Source: Springer Nature journal article supplement (doi:10.1007/s10142-009-0142-y), 2009-10-02
Supplement: MOESM11 [file 10142_2009_142_MOESM11_ESM.pdf]

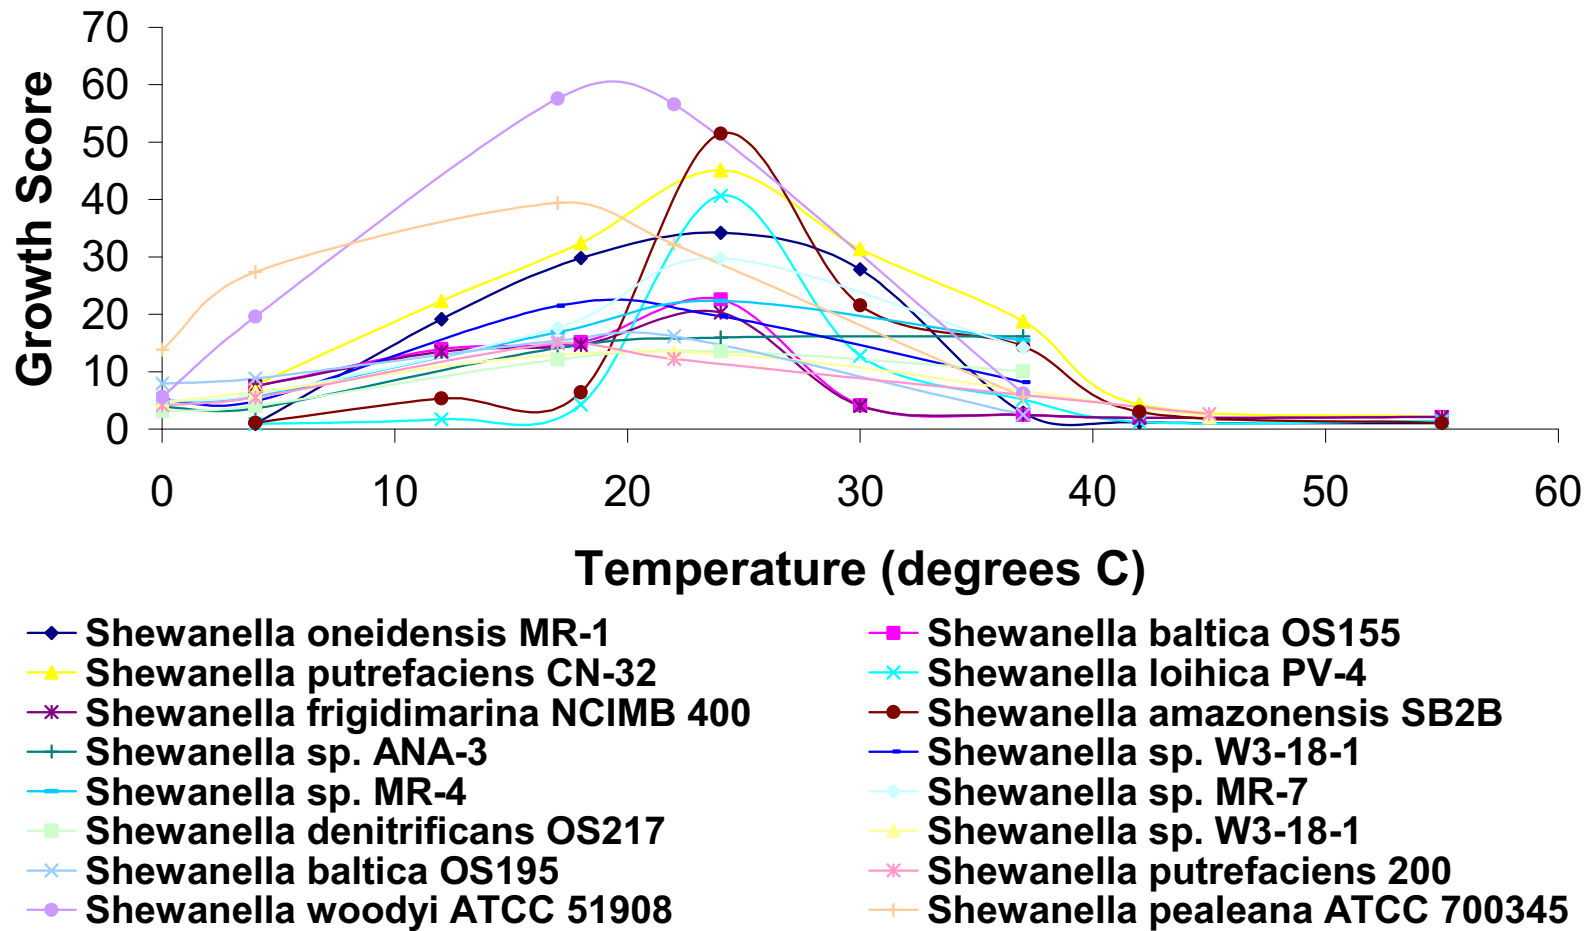

**Supplementary Figure 2.** Growth scores of the tested *Shewanella* strains as functions of their growth temperature. Growth score for each temperature was calculated as the area under the growth profile normalized to 100 hours of the growth as described in Methods.
